# Supplementary material for: Chronological Gene Expression of Human Gingival Fibroblasts with Low Reactive Level Laser (LLL) Irradiation
Source: MDPI journal article supplement (doi:10.3390/jcm10091952), 2021-05-01
Supplement: s1 [file s1]

## Additional data 5

DEGs of the up-regulated genes at 6 hours after LLL irradiation.

| Gene Symbol  | Fold Change | p-value   | Gene Symbol            | Fold Change | p-value   |
|--------------|-------------|-----------|------------------------|-------------|-----------|
| CEP170P1     | 5.1         | 2.11.E-02 | KMT2D                  | 2.4         | 4.70.E-02 |
| NAV2         | 4.14        | 4.27.E-02 | NPIP5; NPIP4;<br>NPIP3 | 2.39        | 1.52.E-02 |
| XYLT1        | 3.85        | 2.70.E-03 | E2F7                   | 2.38        | 2.60.E-03 |
| MIR4655      | 3.56        | 3.83.E-02 | NRGN                   | 2.38        | 6.00.E-04 |
| TNRC6C       | 3.52        | 2.42.E-02 | TRBJ2-6                | 2.35        | 3.60.E-02 |
| CHST3        | 3.33        | 1.30.E-03 | CA5BP1                 | 2.33        | 1.16.E-02 |
| CEP170       | 3.29        | 4.06.E-02 | FGL2                   | 2.33        | 3.00.E-03 |
| MIR4532      | 3.17        | 2.10.E-03 | NPIP3; NPIP4;<br>NPIP5 | 2.31        | 4.10.E-02 |
| TGFB1        | 3.02        | 4.00.E-02 | LOC105373550           | 2.3         | 7.40.E-03 |
| LOC105372640 | 2.99        | 1.94.E-02 | STK10                  | 2.29        | 9.80.E-03 |
| ALPK2        | 2.93        | 4.35.E-02 | RFPL4AL1               | 2.28        | 5.10.E-03 |
| TSHZ3        | 2.8         | 4.86.E-02 | MAP3K11                | 2.28        | 7.30.E-03 |
| LOC100996713 | 2.73        | 6.91.E-05 | LOC105372966           | 2.28        | 2.16.E-02 |
| TBC1D2       | 2.71        | 6.30.E-03 | SNORD111               | 2.27        | 2.76.E-02 |
| LOC100996273 | 2.69        | 2.00.E-04 | FAM120A                | 2.27        | 3.59.E-02 |
| NPIP4; NPIP3 | 2.67        | 1.16.E-02 | LOC105369628           | 2.26        | 3.63.E-02 |
| FAM195A      | 2.66        | 2.33.E-02 | LYZL4                  | 2.25        | 1.24.E-02 |
| ITGA2        | 2.62        | 3.60.E-03 | NAV3                   | 2.25        | 5.60.E-03 |
| LRRC3        | 2.59        | 4.50.E-02 | TGM2                   | 2.21        | 4.71.E-02 |
| PCMTD2       | 2.5         | 1.52.E-02 | TPTE2P6                | 2.2         | 4.40.E-03 |
| CD3EAP       | 2.44        | 8.00.E-04 | STARD8                 | 2.19        | 3.48.E-02 |
| SLC25A6      | 2.44        | 2.07.E-05 | SSBP3                  | 2.19        | 1.58.E-02 |
| LOC400927    | 2.43        | 6.00.E-04 | HSD3BP4                | 2.18        | 1.19.E-02 |
| ZNF609       | 2.41        | 2.01.E-02 | LOC101928195           | 2.17        | 1.87.E-02 |
| BACE1-AS     | 2.4         | 3.13.E-02 | SEMA7A                 | 2.16        | 7.49.E-06 |
