# Supplementary material for: Chronological Gene Expression of Human Gingival Fibroblasts with Low Reactive Level Laser (LLL) Irradiation
Source: MDPI journal article supplement (doi:10.3390/jcm10091952), 2021-05-01
Supplement: s1 [file s1]

## Additional data 8

DEGs of the down-regulated genes at 12 hours after LLL irradiation.

| Gene Symbol                   | Fold Change | p-value   | Gene Symbol            | Fold Change | p-value   |
|-------------------------------|-------------|-----------|------------------------|-------------|-----------|
| CENPF                         | -3.36       | 2.09.E-02 | GTF2IP20               | -2.19       | 9.70.E-03 |
| CEMIP                         | -3.1        | 7.00.E-04 | MAMLD1                 | -2.19       | 2.07.E-02 |
| MKI67                         | -2.98       | 2.11.E-02 | ND1                    | -2.17       | 4.38.E-02 |
| MRC2                          | -2.75       | 2.76.E-02 | ITGA8                  | -2.15       | 1.61.E-02 |
| KRT6B                         | -2.61       | 4.86.E-02 | MIR3160-1              | -2.15       | 3.41.E-02 |
| TNKS                          | -2.6        | 1.20.E-03 | NPIPA7; NPIPA8         | -2.14       | 9.20.E-03 |
| NPIP4; NPIP3                  | -2.54       | 1.23.E-02 | SEMA3D                 | -2.13       | 1.27.E-05 |
| SDHAP1                        | -2.51       | 8.20.E-03 | MIR4681                | -2.13       | 4.41.E-02 |
| RNF213                        | -2.5        | 4.42.E-02 | ZC3H12B                | -2.13       | 6.15.E-05 |
| CENPE                         | -2.49       | 2.94.E-02 | MAP3K11                | -2.1        | 4.80.E-03 |
| ABI3BP                        | -2.49       | 3.89.E-02 | ANK1                   | -2.1        | 4.50.E-03 |
| METTL7A                       | -2.48       | 2.00.E-04 | NAV2                   | -2.1        | 4.57.E-02 |
| NBPF14; NBPF10;<br>NBPF19     | -2.44       | 4.20.E-03 | FAM168A                | -2.1        | 3.69.E-02 |
| HEG1                          | -2.44       | 1.73.E-02 | NIPBL                  | -2.1        | 4.32.E-02 |
| IGLJ2                         | -2.38       | 2.20.E-03 | KRT34                  | -2.08       | 3.00.E-04 |
| CYTB                          | -2.38       | 2.20.E-02 | FAM193A                | -2.07       | 2.10.E-02 |
| ZNF34                         | -2.38       | 3.20.E-03 | NPIP5; NPIP4;<br>NPIP3 | -2.07       | 2.53.E-02 |
| LOC105370710;<br>LOC105379204 | -2.32       | 3.75.E-02 | FBN2                   | -2.07       | 4.16.E-02 |
| TRIM56                        | -2.32       | 6.60.E-03 | B3GLCT                 | -2.06       | 4.83.E-02 |
| RELN                          | -2.29       | 3.25.E-02 | SNRPN; IPW             | -2.06       | 5.10.E-03 |
| ND5                           | -2.28       | 3.11.E-02 | SSH1                   | -2.05       | 6.40.E-03 |
| DCLK2                         | -2.27       | 2.10.E-03 | EVI2B                  | -2.05       | 3.00.E-04 |
| PTPN13                        | -2.26       | 2.20.E-03 | GSTM5                  | -2.05       | 1.00.E-02 |
| DST                           | -2.26       | 1.96.E-02 | BAZ2B                  | -2.05       | 4.18.E-02 |
| KRTAP1-5                      | -2.23       | 5.67.E-06 | LACC1                  | -2.04       | 5.70.E-03 |
