# Supplementary material for: Chronological Gene Expression of Human Gingival Fibroblasts with Low Reactive Level Laser (LLL) Irradiation
Source: MDPI journal article supplement (doi:10.3390/jcm10091952), 2021-05-01
Supplement: s1 [file s1]

## Additional data 1

DEGs of the up-regulated genes at 1 hour after LLL irradiation.

| Gene Symbol      | Fold Change | p-value   | Gene Symbol                   | Fold Change | p-value   |
|------------------|-------------|-----------|-------------------------------|-------------|-----------|
| SNAR-G1          | 2.39        | 4.00.E-04 | ZNF432                        | 1.75        | 2.98.E-02 |
| TRPM5            | 2.34        | 9.70.E-03 | MIR637; DAPK3                 | 1.73        | 2.58.E-02 |
| MIR4277          | 2.22        | 2.21.E-02 | LOC100506257                  | 1.73        | 3.87.E-02 |
| POLR2J3; POLR2J2 | 2.17        | 1.00.E-04 | LOC105375666                  | 1.72        | 2.80.E-03 |
| GSTA2            | 2.12        | 8.00.E-04 | MIR521-2                      | 1.71        | 3.28.E-02 |
| HCP5             | 2.11        | 1.62.E-02 | FAM87B                        | 1.7         | 1.00.E-04 |
| MIR3135B         | 2.01        | 3.70.E-03 | MSTO1                         | 1.69        | 3.55.E-02 |
| SNORD18C; RPL4   | 2.01        | 2.11.E-02 | TEX38                         | 1.67        | 4.16.E-02 |
| MIR338           | 2           | 9.00.E-03 | MIR3130-2                     | 1.67        | 4.44.E-02 |
| LOC100506123     | 1.97        | 1.11.E-02 | LOC101926940                  | 1.67        | 1.40.E-02 |
| TSSK3            | 1.93        | 3.20.E-03 | LOC102724087                  | 1.67        | 4.51.E-02 |
| MIR4756          | 1.88        | 3.57.E-02 | NPIP6                         | 1.67        | 7.70.E-03 |
| GTF2IP20         | 1.88        | 2.47.E-02 | LOC105376834                  | 1.66        | 2.10.E-03 |
| ZNF557           | 1.88        | 4.64.E-02 | LOC105373547;<br>LOC105373552 | 1.65        | 5.00.E-03 |
| LOC101929787     | 1.87        | 3.80.E-03 | FAM185A                       | 1.65        | 3.93.E-02 |
| IGLC2; IGLJ3     | 1.87        | 6.60.E-03 | IGHV1OR21-1                   | 1.65        | 8.20.E-03 |
| SCARNA20         | 1.85        | 2.35.E-02 | LOC105369295                  | 1.64        | 2.85.E-02 |
| DCHS1            | 1.83        | 1.86.E-02 | IGLV2-18                      | 1.62        | 4.00.E-04 |
| POMZP3           | 1.83        | 8.20.E-03 | OXT                           | 1.62        | 2.02.E-02 |
| ZBTB8A           | 1.79        | 4.00.E-04 | PARTICL                       | 1.62        | 2.73.E-02 |
| WASIR2           | 1.79        | 1.06.E-02 | PRELID3A                      | 1.61        | 2.90.E-03 |
| LOC105379221     | 1.78        | 1.20.E-02 | SNHG12                        | 1.61        | 1.11.E-02 |
| LOC101930275     | 1.77        | 1.90.E-03 | LINC00633                     | 1.61        | 4.64.E-02 |
| ZNF730           | 1.75        | 3.36.E-02 | SLC25A5-AS1                   | 1.6         | 1.29.E-02 |
| DNAAF3           | 1.75        | 1.13.E-02 | KRT14                         | 1.6         | 2.20.E-02 |
