# Supplementary material for: Chronological Gene Expression of Human Gingival Fibroblasts with Low Reactive Level Laser (LLL) Irradiation
Source: MDPI journal article supplement (doi:10.3390/jcm10091952), 2021-05-01
Supplement: s1 [file s1]

## Additional data 2

DEGs of the down-regulated genes at 1 hour after LLL irradiation.

| Gene Symbol            | Fold Change | p-value   | Gene Symbol     | Fold Change | p-value   |
|------------------------|-------------|-----------|-----------------|-------------|-----------|
| SNORD13P3              | -2.3        | 4.19.E-02 | LOC105373174    | -1.61       | 9.50.E-03 |
| ZNF138                 | -2.16       | 1.42.E-02 | RPS15A          | -1.6        | 5.60.E-03 |
| MIR125B1               | -2.04       | 4.60.E-02 | OR2A1           | -1.59       | 2.88.E-02 |
| RPL23AP32              | -2.03       | 2.82.E-02 | MIR520A         | -1.58       | 4.00.E-03 |
| ALPPL2                 | -1.9        | 1.96.E-02 | HOXB13          | -1.57       | 1.80.E-02 |
| MIR4279                | -1.88       | 4.90.E-02 | NRARP           | -1.57       | 3.46.E-02 |
| LOC102724913           | -1.88       | 2.70.E-02 | SNORD4B; RPL23A | -1.57       | 5.90.E-03 |
| CYP4F30P               | -1.86       | 1.20.E-03 | PABPC1L2B-AS1   | -1.56       | 2.40.E-03 |
| SNORD126               | -1.81       | 2.55.E-02 | MIR3188         | -1.56       | 3.54.E-02 |
| MIR3163                | -1.8        | 1.33.E-02 | MIR329-2        | -1.55       | 4.10.E-02 |
| RAB6C                  | -1.79       | 1.48.E-02 | SNORD114-17     | -1.55       | 2.79.E-02 |
| RNVU1-6                | -1.75       | 1.44.E-02 | LOC105377378    | -1.54       | 7.60.E-03 |
| MIR1321                | -1.75       | 1.20.E-02 | SCN4B           | -1.54       | 1.98.E-02 |
| SNORA36B;<br>MIR664A   | -1.7        | 7.00.E-03 | MIR128-2        | -1.54       | 4.10.E-03 |
| IGKV2D-24              | -1.67       | 3.54.E-02 | LOC105376517    | -1.53       | 3.94.E-02 |
| IGLV2-11               | -1.65       | 1.94.E-02 | LOC101928919    | -1.53       | 3.11.E-02 |
| RAC3                   | -1.65       | 2.21.E-02 | LOC105375599    | -1.53       | 1.00.E-02 |
| SNORD114-28            | -1.64       | 1.81.E-02 | LOC105374160    | -1.53       | 2.00.E-02 |
| SNORA80A               | -1.64       | 4.31.E-02 | E2F3            | -1.52       | 1.37.E-02 |
| SCARNA5                | -1.62       | 3.70.E-02 | SLC35G3         | -1.51       | 3.48.E-02 |
| CGB2                   | -1.62       | 2.03.E-02 | LSP1P3          | -1.51       | 9.00.E-04 |
| HIST1H2AM;<br>HIST1H3J | -1.62       | 4.08.E-02 | HOXB9           | -1.5        | 3.06.E-02 |
| FBXW4P1                | -1.62       | 2.20.E-02 | SNORD18B; RPL4  | -1.5        | 3.64.E-02 |
| LOC100506217           | -1.61       | 1.55.E-02 | LOC105371452    | -1.5        | 4.69.E-02 |
| FAM26F                 | -1.61       | 3.89.E-02 | PGA5            | -1.5        | 4.71.E-02 |
