# Supplementary material for: Chronological Gene Expression of Human Gingival Fibroblasts with Low Reactive Level Laser (LLL) Irradiation
Source: MDPI journal article supplement (doi:10.3390/jcm10091952), 2021-05-01
Supplement: s1 [file s1]

## Additional data 3

DEGs of the up-regulated genes at 3 hours after LLL irradiation.

| Gene Symbol  | Fold Change | p-value   | Gene Symbol   | Fold Change | p-value   |
|--------------|-------------|-----------|---------------|-------------|-----------|
| SNORA74B     | 2.18        | 3.70.E-02 | LOC100129476  | 1.6         | 8.70.E-03 |
| OR10Q1       | 2.15        | 1.40.E-03 | SLC6A18       | 1.59        | 7.20.E-03 |
| MIR874       | 2.13        | 2.60.E-03 | LOC105370053  | 1.58        | 2.37.E-02 |
| MIR3665      | 2.03        | 1.98.E-02 | LOC399886     | 1.57        | 2.20.E-03 |
| LOC105377562 | 1.99        | 8.00.E-04 | TPSB2; TPSAB1 | 1.57        | 3.08.E-02 |
| TRBV5-4      | 1.88        | 4.12.E-02 | BHLHE23       | 1.57        | 2.86.E-02 |
| LOC105372327 | 1.81        | 3.70.E-03 | TRAJ14        | 1.56        | 5.10.E-03 |
| MIR4481      | 1.79        | 2.30.E-02 | MOGAT3        | 1.55        | 1.18.E-02 |
| TRAJ44       | 1.77        | 6.20.E-03 | SLC52A3       | 1.55        | 3.26.E-02 |
| SULT1A1      | 1.75        | 2.10.E-02 | LOC646730     | 1.55        | 1.30.E-02 |
| LOC105372587 | 1.75        | 3.26.E-02 | LOC100505570  | 1.54        | 3.35.E-02 |
| MIR129-1     | 1.74        | 2.06.E-02 | MIR1911       | 1.54        | 1.01.E-02 |
| LOC105379311 | 1.7         | 3.70.E-03 | LOC101928255  | 1.53        | 2.24.E-02 |
| CYB561D2     | 1.7         | 2.89.E-02 | CYP4F3        | 1.53        | 4.60.E-02 |
| SPATA19      | 1.69        | 1.50.E-03 | LOC101927872  | 1.52        | 4.20.E-03 |
| LOC101928836 | 1.68        | 1.08.E-02 | SLC19A1       | 1.52        | 4.84.E-02 |
| MIR4756      | 1.67        | 2.00.E-03 | IGHE          | 1.52        | 4.58.E-02 |
| CST5         | 1.66        | 1.16.E-02 | TRAJ16        | 1.51        | 5.10.E-03 |
| HTR3B        | 1.65        | 9.40.E-03 | LOC283440     | 1.51        | 4.80.E-03 |
| HP           | 1.63        | 1.16.E-02 | GPR132        | 1.51        | 7.90.E-03 |
| CYP2D6       | 1.62        | 1.21.E-02 | GLRA4         | 1.51        | 2.97.E-02 |
| MIR4289      | 1.62        | 6.00.E-04 | SLC25A18      | 1.5         | 1.40.E-03 |
| TMEM95       | 1.6         | 6.70.E-03 | LOC642574     | 1.5         | 1.06.E-02 |
