# Supplementary material for: Chronological Gene Expression of Human Gingival Fibroblasts with Low Reactive Level Laser (LLL) Irradiation
Source: MDPI journal article supplement (doi:10.3390/jcm10091952), 2021-05-01
Supplement: s1 [file s1]

## Additional data 6

DEGs of the down-regulated genes at 6 hours after LLL irradiation.

| Gene Symbol | Fold Change | p-value   | Gene Symbol    | Fold Change | p-value   |
|-------------|-------------|-----------|----------------|-------------|-----------|
| HIST1H2AI   | -7.78       | 9.00.E-04 | SNORD18C; RPL4 | -2.72       | 1.94.E-02 |
| HIST1H2BB   | -7.46       | 1.50.E-03 | BMS1P6         | -2.69       | 1.56.E-02 |
| HIST1H2AE   | -6.98       | 5.30.E-03 | CNKSR3         | -2.64       | 2.00.E-04 |
| HIST1H2BL   | -6.34       | 4.20.E-03 | LY96           | -2.64       | 3.16.E-02 |
| HIST1H2AM;  | -5.4        | 2.60.E-03 | MIR572         | -2.63       | 4.50.E-03 |
| HIST1H3J    |             |           |                |             |           |
| HIST2H2BE   | -5.2        | 6.00.E-04 | LOC105374160   | -2.62       | 4.36.E-02 |
| HIST1H4E    | -4.68       | 9.70.E-03 | HIST1H3I       | -2.61       | 5.00.E-04 |
| HIST1H2BI   | -4.51       | 3.00.E-04 | HIST1H1B       | -2.57       | 2.00.E-04 |
| HIST1H3F    | -4.41       | 3.00.E-04 | HIST1H4J;      | -2.56       | 9.50.E-03 |
|             |             |           | HIST1H4K       |             |           |
| HIST1H2BK   | -4.35       | 1.50.E-03 | MIR1913        | -2.51       | 1.83.E-02 |
| HIST2H2AB   | -4.02       | 1.80.E-03 | HIST1H2BH      | -2.46       | 8.40.E-03 |
| HIST1H3G    | -3.92       | 2.00.E-04 | PSAT1          | -2.46       | 4.38.E-02 |
| HIST1H1E    | -3.9        | 6.89.E-05 | OR2T34         | -2.43       | 3.60.E-03 |
| HIST1H3E    | -3.77       | 4.33.E-02 | LOC100506844   | -2.43       | 2.60.E-03 |
| LINC01085   | -3.74       | 6.17.E-08 | ZNF680         | -2.41       | 1.73.E-02 |
| SNORA12     | -3.73       | 6.50.E-03 | HIST1H2AG      | -2.36       | 3.06.E-05 |
| HIST1H1C    | -3.64       | 3.00.E-04 | GAREM1         | -2.35       | 2.97.E-02 |
| MAP3K8      | -3.59       | 5.00.E-04 | TMEM116        | -2.34       | 1.60.E-03 |
| HIST1H4D    | -3.52       | 4.30.E-03 | PRAMEF10       | -2.34       | 2.40.E-03 |
| MIR1224     | -3.38       | 6.00.E-04 | CCNE2          | -2.33       | 4.00.E-04 |
| SNORD13     | -3.37       | 2.04.E-02 | HIST2H3A;      | -2.32       | 2.20.E-03 |
|             |             |           | HIST2H3C       |             |           |
| HIST1H4L    | -3.37       | 2.30.E-02 | HIST2H3A;      | -2.32       | 2.20.E-03 |
|             |             |           | HIST2H3C       |             |           |
| SNORA60     | -3.14       | 4.00.E-03 | LOC101930131   | -2.31       | 5.80.E-03 |
| HIST1H4K;   | -2.8        | 1.05.E-02 | MIR199A1       | -2.28       | 1.16.E-02 |
| HIST1H4J    |             |           |                |             |           |
| POT1        | -2.77       | 1.00.E-03 | TMCO6          | -2.28       | 3.08.E-02 |
