# Supplementary material for: Chronological Gene Expression of Human Gingival Fibroblasts with Low Reactive Level Laser (LLL) Irradiation
Source: MDPI journal article supplement (doi:10.3390/jcm10091952), 2021-05-01
Supplement: s1 [file s1]

## Additional data 7

DEGs of the up-regulated genes at 12 hours after LLL irradiation.

| Gene Symbol  | Fold Change | p-value   | Gene Symbol     | Fold Change | p-value   |
|--------------|-------------|-----------|-----------------|-------------|-----------|
| LOC105374715 | 2.56        | 8.60.E-03 | SULT1B1         | 2.03        | 8.39.E-05 |
| TRAJ59       | 2.47        | 2.80.E-03 | SNORA80A        | 2.02        | 4.75.E-02 |
| SNORD114-6   | 2.44        | 9.88.E-05 | LINC01597       | 2.02        | 3.40.E-03 |
| ADAMTS7P1    | 2.38        | 4.87.E-02 | ZNF443          | 2           | 3.30.E-03 |
| DDTL         | 2.35        | 2.66.E-02 | LOC105372367    | 1.99        | 1.92.E-02 |
| POU5F1P4     | 2.33        | 2.00.E-03 | ANKRD30BP2      | 1.98        | 2.70.E-02 |
| MIR3691      | 2.32        | 4.38.E-02 | USP6NL          | 1.96        | 1.29.E-02 |
| IGHV3-48     | 2.3         | 7.20.E-03 | SLC25A52        | 1.96        | 9.10.E-03 |
| LOC101928173 | 2.3         | 3.00.E-04 | RBMV1J; RBMY2FP | 1.95        | 1.17.E-02 |
| MIR921       | 2.3         | 2.33.E-02 | RNU6-56P        | 1.94        | 4.33.E-02 |
| LOC729815    | 2.27        | 1.91.E-02 | SLC19A1         | 1.94        | 1.20.E-03 |
| LOC105378683 | 2.26        | 2.70.E-03 | PMCHL1          | 1.93        | 3.68.E-02 |
| GATA4        | 2.19        | 1.00.E-03 | C16orf86        | 1.93        | 6.00.E-03 |
| IGHV3-20     | 2.17        | 4.40.E-03 | GPR149          | 1.9         | 2.20.E-03 |
| IGFL1        | 2.17        | 5.90.E-03 | LOC102723370    | 1.89        | 2.55.E-02 |
| MIR3175      | 2.16        | 1.32.E-02 | NBPF22P         | 1.88        | 3.42.E-02 |
| LOC102723323 | 2.16        | 1.00.E-03 | IGHA1; IGHV3-66 | 1.88        | 2.41.E-02 |
| LOC105373185 | 2.14        | 9.50.E-03 | MIR892A         | 1.88        | 9.30.E-03 |
| FUT1         | 2.13        | 3.15.E-02 | MIR504          | 1.87        | 4.56.E-02 |
| KRTAP5-2     | 2.12        | 8.00.E-04 | MIR3188         | 1.86        | 9.70.E-03 |
| TBC1D3P5     | 2.12        | 2.00.E-04 | SERPINA6        | 1.85        | 4.80.E-03 |
| LRRC37A6P    | 2.09        | 7.00.E-04 | FCGR1B          | 1.84        | 2.40.E-03 |
| HIST1H2AJ    | 2.09        | 1.10.E-03 | SIGLEC7         | 1.84        | 2.60.E-03 |
| SLC35G5      | 2.06        | 7.00.E-04 | DACT1           | 1.83        | 9.36.E-06 |
| LOC105369301 | 2.05        | 8.00.E-04 | LOC105378066    | 1.83        | 1.60.E-03 |
