# Supplementary material for: Chronological Gene Expression of Human Gingival Fibroblasts with Low Reactive Level Laser (LLL) Irradiation
Source: MDPI journal article supplement (doi:10.3390/jcm10091952), 2021-05-01
Supplement: s1 [file s1]

Additional data 4

DEGs of the down-regulated genes at 3 hours after LLL irradiation.

| Gene Symbol          | Fold Change | p-value   | Gene Symbol     | Fold Change | p-value   |
|----------------------|-------------|-----------|-----------------|-------------|-----------|
| SNORD114-25          | -2.25       | 2.95.E-02 | LOC105375358    | -1.59       | 3.69.E-02 |
| DIP2A-IT1            | -2.21       | 3.06.E-02 | SCARNA9         | -1.59       | 1.04.E-02 |
| HIST1H2AK            | -2.1        | 2.00.E-04 | TRIM61          | -1.57       | 7.80.E-03 |
| SNORD16; RPL4        | -1.98       | 2.80.E-03 | MMP25-AS1       | -1.56       | 1.01.E-02 |
| LOC728024            | -1.93       | 1.72.E-02 | LOC105377866    | -1.55       | 5.50.E-03 |
| SNORD4B; RPL23A      | -1.85       | 1.53.E-02 | TMEM160         | -1.55       | 2.12.E-02 |
| HIST1H3G             | -1.83       | 1.70.E-03 | TPI1P3          | -1.54       | 8.10.E-03 |
| RNU11                | -1.8        | 3.69.E-02 | KRTAP4-12       | -1.54       | 1.56.E-02 |
| MIR302D; MIR302B     | -1.78       | 3.45.E-02 | SNORD58C; RPL17 | -1.54       | 2.74.E-02 |
| SNORA36B;<br>MIR664A | -1.74       | 4.70.E-02 | ACOT2           | -1.53       | 4.97.E-02 |
| TAS2R46              | -1.7        | 3.18.E-02 | LOC101928509    | -1.52       | 4.90.E-02 |
| SNORD58A; RPL17      | -1.68       | 2.54.E-02 | RPS15A          | -1.52       | 4.70.E-03 |
| FAM72D; FAM72C       | -1.67       | 4.00.E-04 | MIR4718         | -1.52       | 8.10.E-03 |
| MIR3167              | -1.66       | 4.50.E-03 | TRAJ30          | -1.51       | 2.35.E-02 |
| PPIP5K1              | -1.63       | 3.60.E-03 | SNORD11         | -1.51       | 1.20.E-03 |
| MIR4678; MINPP1      | -1.62       | 1.92.E-02 | MIR519A1        | -1.51       | 3.75.E-02 |
